# Supplementary material
Source: PubMed Central journal article supplement (PMC6710563)
Supplement: rstb20190012supp1.pdf [file rstb20190012supp1.pdf]

## Supplementary material

### Assigning species to dietary niches and foraging behaviours

Quantitative data on the proportion of resources obtained using different foraging behaviours are generally not available for the majority of species. However, expert descriptions in the literature are usually sufficiently detailed to be translated into coarse categories that capture major differences in foraging behaviours relevant to the global scale of our analysis. Following the method used by Wilman et al. (2014) for quantifying avian diets, we used a standardized protocol to translate qualitative descriptions of foraging behaviour (del Hoyo et al. 2018) into semi-quantitative scores in a systematic way.

For each of the 9 resource types recognised here (aquatic animals, aquatic plants, terrestrial invertebrates, terrestrial vertebrates, terrestrial carrion, nectar, seeds, fruit, other terrestrial plant matter), we scored species for multiple foraging behaviours. In total, across all resource types we recognised 30 different foraging categories, which although not an exhaustive catalogue, reflect the level of detail typically available in published sources and are consistent with previous schemes examining avian guild structure (Fitzpatrick 1985, Croxhall 1987, Remsen & Robinson 1990). For each foraging category, scores were assigned from 0 to 100% in 10% intervals indicating the % of each resource type obtained through that behaviour. In a few very rare cases these scores could be obtained from quantitative information on species foraging strategies. In most cases, however, scores were based on the particular terminology and relative word usage of foraging behaviours described in del Hoyo et al. (2016). For consistency, we aimed to obtain information from this single source but we supplemented this with additional searches of primary literature and online materials where detailed information was lacking. If a single foraging behaviour was described this received a score of 100. Where multiple foraging behaviours were mentioned, we used general terms describing their relative frequency as an initial guide (e.g. 'mostly' > 6, 'sometimes' = 2, occasionally = 1), adjusting these scores according to the remaining content of the description, family level summary descriptions, as well as additional literature searches. If no indication on the relative use of different behaviours was provided, categories listed earlier in the description were up-weighted relative to those listed at the end. In cases where foraging behaviours were not explicitly mentioned, this information could sometimes be inferred unambiguously from information on the microhabitat and dietary items utilized. By taking the product of the % of the species' diet consisting of a particular resource type and the % of that resource type obtained through a particular foraging behaviour, we calculated the total % contribution of each of the 30 foraging behaviours to a species' overall diet.

Some foraging behaviours are unique to a single dietary niche (e.g. bark probing is only utilised by invertivores), while others can be employed for obtaining different resource types (e.g. species foraging on the ground can eat invertebrates, fruits, seeds etc). Because our models predicting threat status contain diet as a factor and in order to limit the number of different foraging behaviours that we estimate an effect for, we distilled the 30 foraging categories into a smaller set of eight categories by lumping analogous behaviours across diets. The final categories we used are: 'Aerial screen', 'Bark glean', 'Aerial sally', 'Arboreal glean', 'Ground forage', 'Aquatic plunge', 'Aquatic surface' and 'Aquatic dive'.

Based on the scores for each diet category, we assigned species to a single diet category if this contributed to at least 50% of its total diet. If a species scored 50% for two categories, the species was assigned to the category that had the greatest average score across the entire family. This procedure for dealing with tied scores was used because it means that for species to be assigned to a novel category (with respect to other closely related species) there must be a substantial difference in its diet and is thus conservative to errors arising from converting textual descriptions to quantitative scores. If species obtained less than 50% of their resources through any single resource type, the species was classified as an 'omnivore', resulting in a total of ten dietary niches. We used an identical protocol to assign each species to a single foraging behaviour. In this case, species employing multiple foraging behaviours in relatively equal proportions were assigned as either 'foraging generalists', resulting in a total of nine foraging behaviour categories.

#### References

Croxall JP. 1987. *Seabirds: feeding ecology and role in marine ecosystems*. Cambridge University Press.

Fitzpatrick JW. 1985. Form, foraging behavior, and adaptive radiation in the Tyrannidae. *Ornithol Monogr* **36**, 447–470. doi:10.2307/40168298.

del Hoyo J, Elliott A, Sargatal J, Christie DA, de Juana E. 2018. *Handbook of the Birds of the World Alive*. Lynx Edicions, Barcelona. Information accessed at <https://www.hbw.com>

Remsen JV, Robinson SK. 1990. A classification scheme for foraging behavior of birds in terrestrial habitats. *Stud Avian Biol* **13**, 144–160.

Wilman W, Belmaker J, Simpson J, de la Rosa C, Rivadeneira MM, Jetz W. 2014. EltonTraits 1.0: Species-level foraging attributes of the world's birds and mammals. *Ecology* **95**, 2027–2027.

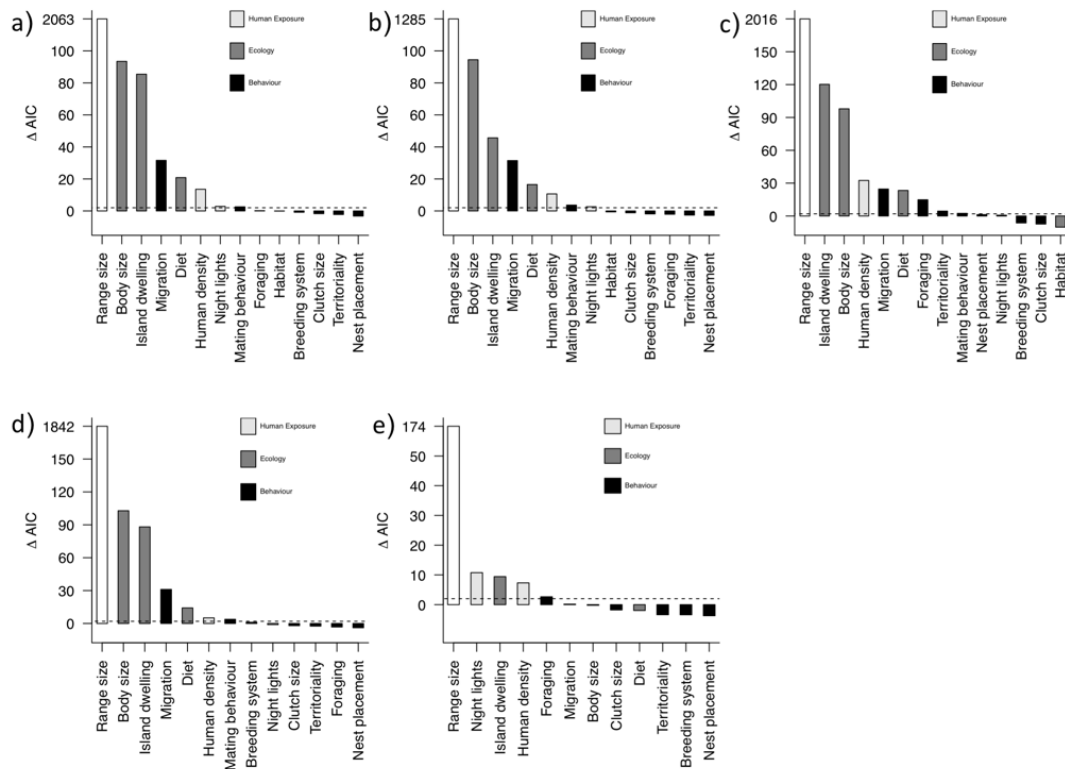

**Figure S1.** The relative contribution of anthropogenic, ecological and behavioural predictors to explaining threat status in the full multivariate model. Results are shown for a) all birds with models fit using using a generalized linear mixed effects model ( $n = 9658$ ), b) all birds excluding species classified as threatened according to criteria B ( $n = 9337$ ), c) all birds with models fit using using a phylogenetic generalized mixed effects model ( $n = 9658$ ), d) terrestrial birds ( $n = 8495$ ) and e) aquatic birds ( $n = 767$ ). Predictor contributions are quantified as the difference in AIC between the full model and a model excluding each predictor. Predictor are colored according to variable type. The dashed line indicates a difference of 2 AIC units indicating strong support for variable inclusion.

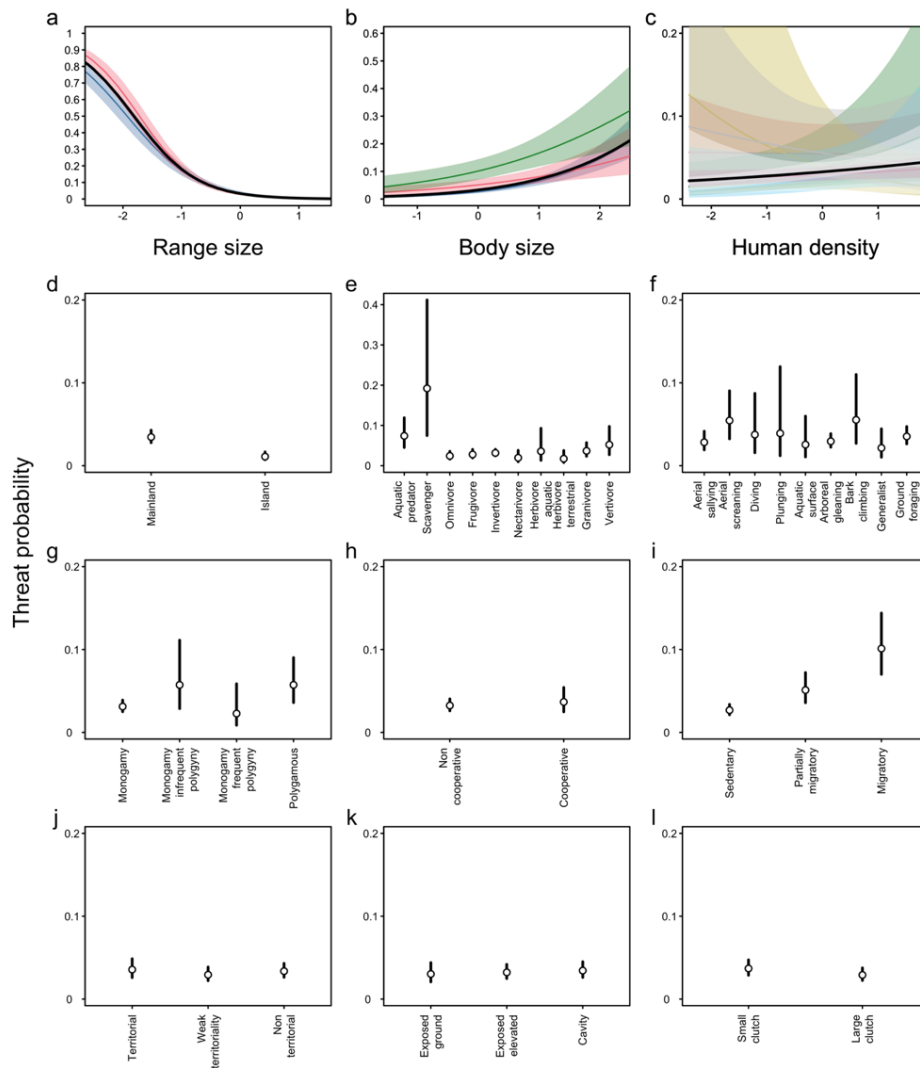

**Figure S2.** The influence of behaviour on the the probability of threat across birds excluding species listed as threatened under criteria B (n= 9658). a) effects of range size mediated by clutch size, b) effects of body size mediated by migratory behaviour, c) effects of human population density mediated by foraging behaviour, d) island dwelling, e) diet, f) foraging behaviour, g) mating behaviour, h) breeding system, i) migratory behaviour, j) territoriality, k) nest placement and l) clutch size. Results are from a generalized linear mixed effects model including all predictor variables and family as a random effect. Clutch size is a continuous variable but is here shown as a binary trait (small or large clutch size) to enable visualising the interaction with range size (a). Bars indicate the 95% prediction interval.

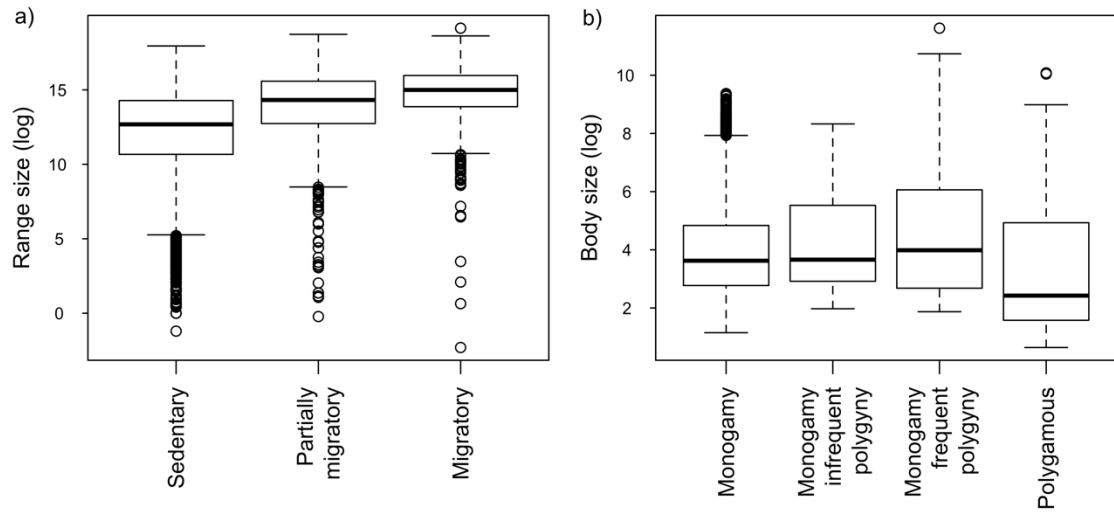

**Figure S3.** Associations between behavioural factors and key drivers of threat status. a) range size increases with migratory tendency and b) average body size is small among polygamous species compared to monogamous species. Range size and body size are log-transformed.

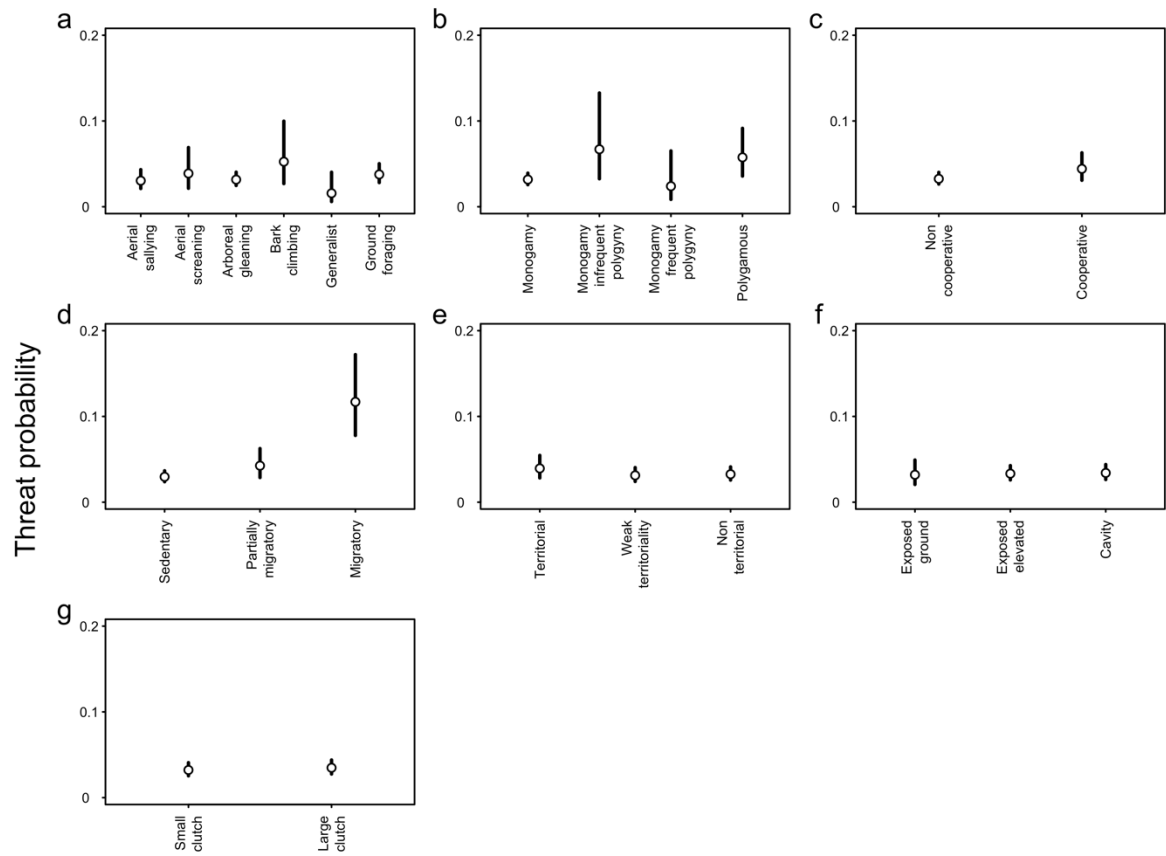

**Figure S4.** The influence of behaviour on the the probability of threat across terrestrial birds (n= 8495). a) foraging behaviour, b) mating behaviour, c) breeding system, d) migratory behaviour, e) territoriality, f) nest placement and g) clutch size. Results are from a generalized linear mixed effects model including all predictor variables and family as a random effect. Bars indicate the 95% prediction interval.

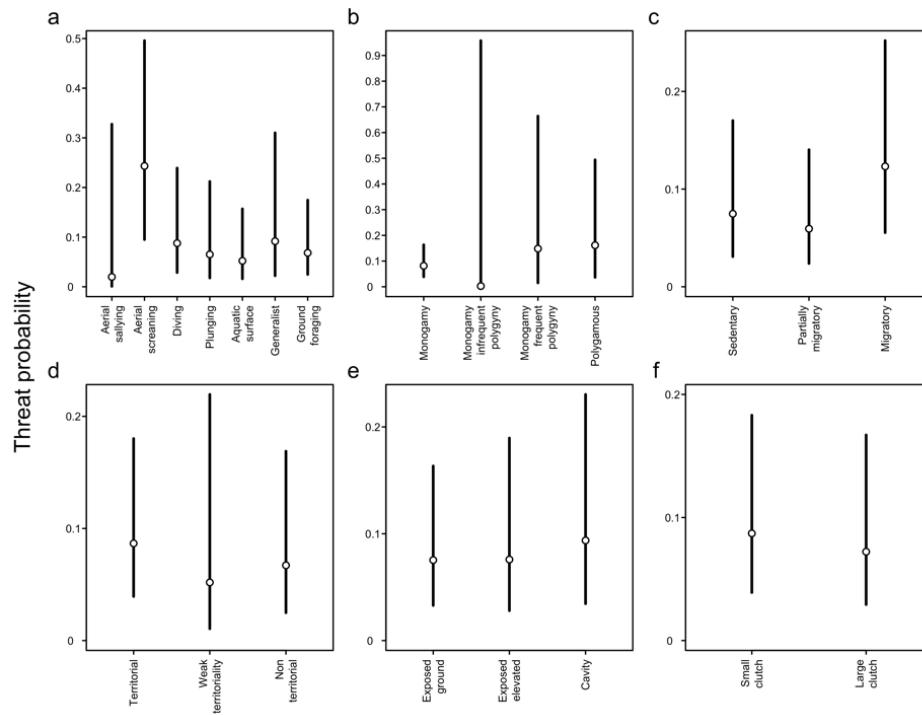

**Figure S5.** The influence of behaviour on the the probability of threat across aquatic birds (n= 767). a) foraging behaviour, b) mating behaviour, c) migratory behaviour, d) territoriality, e) nest placement and f) clutch size. Results are from a generalized linear mixed effects model including all predictor variables and family as a random effect. Bars indicate the 95% prediction interval.

**Table S1** Generalised variance inflation factors (GVIF) of predictors used to model threat across birds (n = 9658).

| Predictor          | GVIF  | Df   | GVIF <sup>1/(2*Df)</sup> |
|--------------------|-------|------|--------------------------|
| Body size          | 2.47  | 1.00 | 1.57                     |
| Diet               | 33.08 | 9.00 | 1.21                     |
| Habitat            | 6.98  | 3.00 | 1.38                     |
| Island dwelling    | 1.58  | 1.00 | 1.26                     |
| Night lights       | 1.65  | 1.00 | 1.28                     |
| Human density      | 1.77  | 1.00 | 1.33                     |
| Foraging behaviour | 11.57 | 8.00 | 1.17                     |
| Mating behaviour   | 1.63  | 3.00 | 1.08                     |
| Breeding system    | 1.06  | 1.00 | 1.03                     |
| Migration          | 1.82  | 2.00 | 1.16                     |
| Territoriality     | 2.17  | 2.00 | 1.21                     |
| Nest placement     | 2.04  | 2.00 | 1.19                     |
| Clutch size        | 1.57  | 1.00 | 1.25                     |
| Range size         | 2.36  | 1.00 | 1.54                     |

Degrees of freedom (Df).



**Table S2** Predictors included in each model to predict threat status along with model support (AIC). Threat status (0, 1) was modelled using a generalised linear mixed effects model including taxonomic family as a random effect. Rows correspond to different models, with the predictors included in each model indicated by colored cells. Models were fit across different data subsets including: all species ( $n = 9658$ ), threatened species ( $n = 1251$ ) and all species excluding those designated as threatened under criteria B ( $n = 9337$ ). AIC values in bold indicate predictors that are highly supported for inclusion in the full model (i.e.  $\Delta AIC > 2$ ). For the model including all species ( $n = 9658$ ), cell color indicates the direction of each effect (for continuous traits) with shading indicating the significance level.

|                           | Ecology    |           |      |         | Exposure        |              | Behaviour     |          |        |                 |           |                | All species (n = 9658) |             |                          | Threatened species (n = 1251) |                          | Excluding criteria B (n = 9337) |               |               |              |               |               |        |
|---------------------------|------------|-----------|------|---------|-----------------|--------------|---------------|----------|--------|-----------------|-----------|----------------|------------------------|-------------|--------------------------|-------------------------------|--------------------------|---------------------------------|---------------|---------------|--------------|---------------|---------------|--------|
|                           | Range size | Body size | Diet | Habitat | Island dwelling | Night lights | Human density | Foraging | Mating | Breeding system | Migration | Territoriality | Nest placement         | Clutch size | Range size : clutch size | Body size : migration         | Human density : foraging | AIC                             | $\Delta AIC$  | AIC           | $\Delta AIC$ | AIC           | $\Delta AIC$  |        |
| Univariate                |            |           |      |         |                 |              |               |          |        |                 |           |                |                        |             |                          |                               |                          | 7117.1                          | 2469.6        | 1723.0        | 141.3        | 5749.7        | 1609.3        |        |
|                           |            |           |      |         |                 |              |               |          |        |                 |           |                |                        |             |                          |                               |                          |                                 | 7160.7        | 2513.1        | 1725.2       | 143.6         | 5784.9        | 1644.5 |
|                           |            |           |      |         |                 |              |               |          |        |                 |           |                |                        |             |                          |                               |                          |                                 | 7150.1        | 2502.6        | 1725.9       | 144.3         | 5783.2        | 1642.8 |
|                           |            |           |      |         |                 |              |               |          |        |                 |           |                |                        |             |                          |                               |                          |                                 | 7132.5        | 2485.0        | 1721.8       | 140.1         | 5779.4        | 1639.0 |
|                           |            |           |      |         |                 |              |               |          |        |                 |           |                |                        |             |                          |                               |                          |                                 | 7158.4        | 2510.8        | 1724.8       | 143.1         | 5782.2        | 1641.8 |
|                           |            |           |      |         |                 |              |               |          |        |                 |           |                |                        |             |                          |                               |                          |                                 | 7155.8        | 2508.3        | 1725.9       | 144.2         | 5783.6        | 1643.2 |
|                           |            |           |      |         |                 |              |               |          |        |                 |           |                |                        |             |                          |                               |                          |                                 | 7159.6        | 2512.1        | 1724.7       | 143.0         | 5782.7        | 1642.3 |
|                           |            |           |      |         |                 |              |               |          |        |                 |           |                |                        |             |                          |                               |                          |                                 | 7076.4        | 2428.9        | 1716.0       | 134.4         | 5724.4        | 1584.0 |
|                           |            |           |      |         |                 |              |               |          |        |                 |           |                |                        |             |                          |                               |                          |                                 | 7078.2        | 2430.6        | 1722.5       | 140.9         | 5727.9        | 1587.5 |
|                           |            |           |      |         |                 |              |               |          |        |                 |           |                |                        |             |                          |                               |                          |                                 | 6843.4        | 2195.9        | 1720.3       | 138.6         | 5553.5        | 1413.2 |
|                           |            |           |      |         |                 |              |               |          |        |                 |           |                |                        |             |                          |                               |                          |                                 | 7137.8        | 2490.3        | 1724.2       | 142.6         | 5768.3        | 1628.0 |
|                           |            |           |      |         |                 |              |               |          |        |                 |           |                |                        |             |                          |                               |                          |                                 | 7142.6        | 2495.1        |              |               | 5770.2        | 1629.8 |
|                           |            |           |      |         |                 |              |               |          |        |                 |           |                |                        |             |                          |                               |                          |                                 | 7074.8        | 2427.3        | 1724.5       | 142.8         | 5674.0        | 1533.7 |
|                           |            |           |      |         |                 |              |               |          |        |                 |           |                |                        |             |                          |                               |                          |                                 | 4940.3        | 292.8         | 1618.8       | 37.2          | 4385.9        | 245.5  |
| Leave one out             |            |           |      |         |                 |              |               |          |        |                 |           |                |                        |             |                          |                               |                          | 4645.8                          | -1.7          | 1581.8        | 0.2          | 4139.2        | -1.1          |        |
|                           |            |           |      |         |                 |              |               |          |        |                 |           |                |                        |             |                          |                               |                          | 4644.3                          | -3.2          | 1578.1        | -3.6         | 4137.6        | -2.8          |        |
|                           |            |           |      |         |                 |              |               |          |        |                 |           |                |                        |             |                          |                               |                          | 4645.3                          | -2.2          | 1577.8        | -3.8         | 4137.8        | -2.6          |        |
|                           |            |           |      |         |                 |              |               |          |        |                 |           |                |                        |             |                          |                               |                          | <b>4679.1</b>                   | <b>31.6</b>   | 1579.0        | -2.7         | <b>4171.8</b> | <b>31.5</b>   |        |
|                           |            |           |      |         |                 |              |               |          |        |                 |           |                |                        |             |                          |                               |                          | 4646.7                          | -0.8          | 1579.7        | -2.0         | 4138.5        | -1.8          |        |
|                           |            |           |      |         |                 |              |               |          |        |                 |           |                |                        |             |                          |                               |                          | <b>4650.1</b>                   | <b>2.6</b>    | 1578.1        | -3.5         | <b>4144.0</b> | <b>3.7</b>    |        |
|                           |            |           |      |         |                 |              |               |          |        |                 |           |                |                        |             |                          |                               |                          | 4647.7                          | 0.2           | <b>1591.8</b> | <b>10.2</b>  | 4138.3        | -2.0          |        |
|                           |            |           |      |         |                 |              |               |          |        |                 |           |                |                        |             |                          |                               |                          | <b>4661.1</b>                   | <b>13.6</b>   | 1580.8        | -0.8         | <b>4151.0</b> | <b>10.6</b>   |        |
|                           |            |           |      |         |                 |              |               |          |        |                 |           |                |                        |             |                          |                               |                          | <b>4650.4</b>                   | <b>2.9</b>    | 1580.7        | -1.0         | <b>4143.0</b> | <b>2.6</b>    |        |
|                           |            |           |      |         |                 |              |               |          |        |                 |           |                |                        |             |                          |                               |                          | <b>4733.0</b>                   | <b>85.4</b>   | <b>1604.1</b> | <b>22.4</b>  | <b>4186.1</b> | <b>45.7</b>   |        |
|                           |            |           |      |         |                 |              |               |          |        |                 |           |                |                        |             |                          |                               |                          | 4647.5                          | -0.1          | 1582.8        | 1.1          | 4139.8        | -0.6          |        |
|                           |            |           |      |         |                 |              |               |          |        |                 |           |                |                        |             |                          |                               |                          | <b>4668.4</b>                   | <b>20.8</b>   |               |              | <b>4156.9</b> | <b>16.5</b>   |        |
|                           |            |           |      |         |                 |              |               |          |        |                 |           |                |                        |             |                          |                               |                          | <b>4741.0</b>                   | <b>93.5</b>   | <b>1591.7</b> | <b>10.1</b>  | <b>4234.8</b> | <b>94.5</b>   |        |
|                           |            |           |      |         |                 |              |               |          |        |                 |           |                |                        |             |                          |                               |                          | <b>6710.8</b>                   | <b>2063.3</b> | <b>1725.2</b> | <b>143.5</b> | <b>5425.0</b> | <b>1284.7</b> |        |
| Excluding behaviour       |            |           |      |         |                 |              |               |          |        |                 |           |                |                        |             |                          |                               | 4678.5                   | 31.0                            | 1577.1        | -4.5          | 4169.0       | 28.6          |               |        |
| Full model                |            |           |      |         |                 |              |               |          |        |                 |           |                |                        |             |                          |                               | 4647.5                   | 0.0                             | 1581.7        | 0.0           | 4140.4       | 0.0           |               |        |
| Full model + interactions |            |           |      |         |                 |              |               |          |        |                 |           |                |                        |             |                          |                               | 4618.2                   |                                 |               |               |              |               |               |        |

|                         | <0.001     | <0.01 | <0.05       | NS    |
|-------------------------|------------|-------|-------------|-------|
| Negative effect         | Dark Blue  | Blue  | Light Blue  | White |
| Positive effect         | Dark Green | Green | Light Green | White |
| Factor/interaction term | Dark Grey  | Grey  | Light Grey  | White |
